# Supplementary material for: Dietary Intake and Diet Quality of Adult Survivors of Childhood Cancer and the General Population: Results from the SCCSS-Nutrition Study
Source: MDPI journal article supplement (doi:10.3390/nu13061767), 2021-05-22
Supplement: s1 [file s1]

## SUPPLEMENTARY DATA

**Supplemental Table S1.** Clinical characteristics of childhood cancer survivors

| Characteristics                                | <b>CCSs<br/>(n = 775)</b> |
|------------------------------------------------|---------------------------|
| <b>ICCC-3 diagnosis, n (%)</b>                 |                           |
| I: Leukemia                                    | 238 (31)                  |
| II: Lymphoma                                   | 163 (21)                  |
| III: CNS tumor                                 | 79 (10)                   |
| IV: Neuroblastoma                              | 28 (4)                    |
| V: Retinoblastoma                              | 12 (2)                    |
| VI: Renal tumor                                | 52 (7)                    |
| VII: Hepatic tumor                             | 6 (<1)                    |
| VIII: Bone tumor                               | 49 (6)                    |
| IX: Soft tissue sarcoma                        | 64 (8)                    |
| X: Germ cell tumor                             | 40 (5)                    |
| XI & XII: Other tumor                          | 25 (3)                    |
| Langerhans cell histiocytosis                  | 19 (2)                    |
| <b>Age at diagnosis, n (%)</b>                 |                           |
| <5 yrs                                         | 251 (32)                  |
| 5-9 yrs                                        | 163 (21)                  |
| 10-14 yrs                                      | 225 (29)                  |
| 15-20 yrs                                      | 136 (18)                  |
| <b>Time since diagnosis,<sup>a</sup> yrs</b>   | 25.7 (20.0-31.1)          |
| <b>History of relapse, n (%)</b>               | 89 (11)                   |
| <b>Treatment exposures, n (%)</b>              |                           |
| <b>Radiation, n (%)</b>                        |                           |
| Any                                            | 286 (37)                  |
| Cranial                                        | 120 (15)                  |
| <18 Gy                                         | 37 (5)                    |
| ≥18 Gy                                         | 83 (11)                   |
| Chest                                          | 89 (11)                   |
| <30 Gy                                         | 35 (5)                    |
| ≥30 Gy                                         | 54 (7)                    |
| TBI and/or abdominal                           | 68 (9)                    |
| <b>Glucocorticoids</b>                         | 331 (43)                  |
| <b>Anthracyclines</b>                          | 293 (38)                  |
| <b>Alkylating agents</b>                       | 321 (41)                  |
| <b>Hematopoietic stem cell transplantation</b> | 30 (4)                    |

Abbreviations: CCS, childhood cancer survivor; CNS, central nervous system; Gy, gray; ICCC-3, *International Childhood Cancer Classification*, 3<sup>rd</sup> edition; TBI, total body irradiation.

<sup>a</sup> Values are medians (IQRs).

**Supplemental Table S2.** Dietary intake in childhood cancer survivors and the general population in Switzerland compared to the DACH dietary recommendations

| Nutrients                               | DACH<br>recommendations <sup>b</sup> |           | CCSs<br>(n = 775) |                     | Population-based samples             |                     |                                   |                     |
|-----------------------------------------|--------------------------------------|-----------|-------------------|---------------------|--------------------------------------|---------------------|-----------------------------------|---------------------|
|                                         |                                      |           |                   |                     | Bus Santé <sup>a</sup><br>(n = 2531) |                     | CoLaus <sup>a</sup><br>(n = 1276) |                     |
|                                         | men                                  | women     | mean (SD)         | % DACH <sup>c</sup> | mean (SD)                            | % DACH <sup>c</sup> | mean (SD)                         | % DACH <sup>c</sup> |
| Total energy, kcal <sup>d</sup>         | 2300-3400                            | 1800-2600 | 1638 (582)        | 65                  | 1732 (611)                           | 69                  | 1923 (668)                        | 74                  |
| Macronutrients                          |                                      |           |                   |                     |                                      |                     |                                   |                     |
| Protein, g                              | 57                                   | 48        | 66.1 (29.5)       | 126                 | 69.8 (28.8)                          | 133                 | 74.8 (29.4)                       | 140                 |
| % of energy <sup>e</sup>                | 10-20                                | 10-20     | 16.1 (3.6)        | 108                 | 16.2 (3.6)                           | 108                 | 15.7 (3.3)                        | 104                 |
| Vegetable, g                            |                                      |           | 18.1 (7.6)        |                     | 20.1 (9.2)                           |                     | 22.2 (9.6)                        |                     |
| Animal, g                               |                                      |           | 48.0 (26.9)       |                     | 49.7 (25.0)                          |                     | 52.6 (24.4)                       |                     |
| Carbohydrates, g <sup>f</sup>           | 225-275                              | 225-275   | 180 (74)          | 72                  | 193 (84)                             | 77                  | 224 (89.9)                        | 90                  |
| % of energy <sup>e, f</sup>             | 45-55                                | 45-55     | 44.0 (8.8)        | 88                  | 44.2 (9.1)                           | 88                  | 46.5 (8.1)                        | 93                  |
| Mono/disaccharides, g                   |                                      |           | 86 (46)           |                     | 92 (48)                              |                     | 107 (53)                          |                     |
| Polysaccharides, g                      |                                      |           | 94 (44)           |                     | 100 (53)                             |                     | 116 (57)                          |                     |
| Total fiber, g <sup>f</sup>             | ≥30                                  | ≥30       | 12.2 (6.4)        | 41                  | 14.2 (8.0)                           | 47                  | 15.0 (8.0)                        | 50                  |
| Total fat, g                            |                                      |           | 68.1 (28.2)       |                     | 69.6 (27.5)                          |                     | 73.5 (28.7)                       |                     |
| Total fat, % of energy <sup>e</sup>     | 30-40                                | 30-40     | 37.4 (6.9)        | 107                 | 36.3 (7.0)                           | 104                 | 34.5 (6.2)                        | 99                  |
| Saturated fat, g                        |                                      |           | 25.2 (11.6)       |                     | 24.2 (10.9)                          |                     | 27.5 (12.4)                       |                     |
| Saturated fat, % of energy <sup>g</sup> | <10                                  | <10       | 13.7 (3.2)        | 137                 | 12.5 (3.1)                           | 125                 | 12.8 (3.1)                        | 128                 |
| Monounsaturated fat, g                  |                                      |           | 28.6 (12.7)       |                     | 29.5 (12.7)                          |                     | 29.4 (11.9)                       |                     |
| Polyunsaturated fat, g                  |                                      |           | 8.6 (3.8)         |                     | 9.7 (4.2)                            |                     | 10.3 (4.7)                        |                     |
| Cholesterol, mg <sup>e</sup>            | 300                                  | 300       | 342 (208)         | 114                 | 342 (219)                            | 114                 | 323 (141)                         | 108                 |
| Micronutrients                          |                                      |           |                   |                     |                                      |                     |                                   |                     |
| Vitamins                                |                                      |           |                   |                     |                                      |                     |                                   |                     |
| A, mg-RE <sup>h</sup>                   | 1.0                                  | 0.8       | 0.7 (0.7)         | 79                  | 0.7 (0.5)                            | 76                  | 0.8 (0.7)                         | 87                  |
| D, µg                                   | 20                                   | 20        | 2.4 (2.0)         | 12                  | 3.1 (2.6)                            | 16                  | 2.6 (1.9)                         | 13                  |
| Minerals                                |                                      |           |                   |                     |                                      |                     |                                   |                     |
| Sodium, g <sup>i</sup>                  | 1.5                                  | 1.5       | 2.9 (0.7)         | 192                 | 2.9 (0.7)                            | 194                 | 3.0 (0.7)                         | 202                 |
| Potassium, g                            | 4.0                                  | 4.0       | 2.3 (0.9)         | 58                  | 2.5 (1.1)                            | 64                  | 2.5 (1.0)                         | 64                  |
| Calcium, mg                             | 1000                                 | 1000      | 889 (470)         | 89                  | 835 (433)                            | 84                  | 1040 (543)                        | 104                 |
| Phosphorus, mg                          | 700                                  | 700       | 1178 (451)        | 168                 | 1194 (473)                           | 171                 | 1234 (476)                        | 176                 |
| Iron, mg                                | 104                                  | 15        | 9.0 (3.6)         | 72                  | 10.1 (3.9)                           | 81                  | 10.8 (3.9)                        | 90                  |
| Alcohol, g <sup>i</sup>                 | 20                                   | 10        | 5.7 (7.8)         | 38                  | 7.9 (10.2)                           | 51                  | 9.3 (12.6)                        | 58                  |

Abbreviations: CCS, childhood cancer survivors; DACH, Dietary recommendations for Germany (D), Austria (A) and Switzerland (CH).

<sup>a</sup> Standardized on sex and age at survey according to CCSs.<sup>b</sup> DACH recommendations for the general population age 20-50 years, excluding pregnant and lactating women, 2015.

## Dietary intake and diet quality of adult survivors of childhood cancer and the general population: Results from the SCCSS-Nutrition study

<sup>c</sup> Percentage of mean intake in relation to the DACH recommended intake level \* 100. Recommended intake is estimated on the basis of the age-sex groups of the DACH guidelines, weighted by the age and sex distribution of the study population. For alcohol intake the maximum tolerated dosage was taken.

<sup>d</sup> Depending on physical activity level (PAL, 1.4-1.8) and age.

<sup>e</sup> Federal Food Safety and Veterinary Office FSVO, [www.naehrwertdaten.ch](http://www.naehrwertdaten.ch).

<sup>f</sup> BLV (2009). Kohlenhydrate in unserer Ernährung – Empfehlungen des BLV. [www.blv.admin.ch](http://www.blv.admin.ch).

<sup>g</sup> BLV (2012). Fett in unserer Ernährung – Empfehlung des BLV. [www.blv.admin.ch](http://www.blv.admin.ch), recommendations as a percentage of the daily energy demand and based on a daily energy intake of 2000 kcal.

<sup>h</sup> Total vitamin A= retinol + carotene/12, expressed in µg RAE.

<sup>i</sup> Na intake based on FFQ data was calculated with the equation:  $(8.20 + 0.38 \times \text{FFQ in males})/2.54$  and  $(4.55 + 0.67 \times \text{FFQ in females})/2.54$ , with 1 g Na = 2.54 g salt (NaCl) [26]

<sup>j</sup> Maximum tolerated dosage.

**Supplemental Table S3.** Dietary intake in childhood cancer survivors by sex compared to the DACH dietary recommendations

| Nutrients                               | DACH recommendations <sup>a</sup> |             | CCSs<br>(n = 775) |                     |                 |                     |
|-----------------------------------------|-----------------------------------|-------------|-------------------|---------------------|-----------------|---------------------|
|                                         | men                               | women       | men (n = 386)     |                     | women (n = 389) |                     |
|                                         |                                   |             | mean (SD)         | % DACH <sup>c</sup> | mean (SD)       | % DACH <sup>c</sup> |
| Total energy, kcal <sup>b</sup>         | 2,300-3,400                       | 1,800-2,600 | 1,743 (632)       | 61                  | 1,535 (507)     | 70                  |
| <b>Macronutrients</b>                   |                                   |             |                   |                     |                 |                     |
| Protein, g                              | 57                                | 48          | 73.8 (33.8)       | 129                 | 58.5 (22.0)     | 122                 |
| % of energy <sup>d</sup>                | 10-20                             | 10-20       | 16.9 (3.7)        | 112                 | 15.4 (3.4)      | 103                 |
| Vegetal, g                              |                                   |             | 18.3 (7.7)        |                     | 17.9 (7.5)      |                     |
| Animal, g                               |                                   |             | 55.5 (30.7)       |                     | 40.6 (19.8)     |                     |
| Carbohydrates, g <sup>e</sup>           | 225-275                           | 225-275     | 187 (76.2)        | 75                  | 174 (71)        | 70                  |
| % of energy <sup>d, e</sup>             | 45-55                             | 45-55       | 42.8 (8.4)        | 86                  | 45.2 (9.1)      | 90                  |
| Mono/disaccharides, g                   |                                   |             | 87 (46)           |                     | 84 (46)         |                     |
| Polysaccharides, g                      |                                   |             | 98 (46)           |                     | 90 (42)         |                     |
| Total fiber, g <sup>e</sup>             | ≥30                               | ≥30         | 11.5 (5.8)        | 38                  | 12.8 (6.9)      | 43                  |
| Total fat, g                            |                                   |             | 72.2 (30.2)       |                     | 64.1 (25.4)     |                     |
| Total fat, % of energy <sup>d</sup>     | 30-40                             | 30-40       | 37.2 (6.6)        | 106                 | 37.5 (7.2)      | 107                 |
| Saturated fat, g                        |                                   |             | 27.3 (12.5)       |                     | 23.1 (10.4)     |                     |
| Saturated fat, % of energy <sup>f</sup> | <10                               | <10         | 14.0 (2.9)        | 140                 | 13.5 (3.4)      | 135                 |
| Monounsaturated fat, g                  |                                   |             | 29.9 (13.3)       |                     | 27.3 (11.9)     |                     |
| Polyunsaturated fat, g                  |                                   |             | 9.0 (3.9)         |                     | 8.2 (3.6)       |                     |
| Cholesterol, mg <sup>d</sup>            | 300                               | 300         | 376 (209)         | 125                 | 310 (202)       | 103                 |
| <b>Micronutrients</b>                   |                                   |             |                   |                     |                 |                     |
| <b>Vitamins</b>                         |                                   |             |                   |                     |                 |                     |
| A, mg-RE <sup>g</sup>                   | 0.85                              | 0.7         | 0.7 (0.7)         | 71                  | 0.7 (0.7)       | 89                  |
| D, µg                                   | 20                                | 20          | 2.5 (2.0)         | 12                  | 2.3 (2.0)       | 12                  |
| <b>Minerals</b>                         |                                   |             |                   |                     |                 |                     |
| Sodium, g                               | 1.5                               | 1.5         | 3.5 (0.1)         | 236                 | 2.2 (0.2)       | 149                 |
| Potassium, g                            | 4.0                               | 4.0         | 2.4 (0.9)         | 61                  | 2.2 (0.9)       | 55                  |
| Calcium, mg                             | 1,000                             | 1,000       | 908 (502)         | 91                  | 869 (437)       | 87                  |
| Phosphorus, mg                          | 700                               | 700         | 1,307 (495)       | 187                 | 1050 (361)      | 150                 |
| Iron, mg                                | 10 <sup>c</sup>                   | 15          | 9.7 (3.9)         | 97                  | 8.3 (3.0)       | 56                  |
| Alcohol, g <sup>h</sup>                 | 20                                | 10          | 7.5 (7.9)         | 37                  | 4.0 (7.2)       | 40                  |

Abbreviations: CCS, childhood cancer survivors; DACH, Dietary recommendations for Germany (D), Austria (A) and Switzerland (CH).

<sup>a</sup> DACH recommendations for the general population age 20-50 years, excluding pregnant and lactating women, 2015.

<sup>b</sup> Depending on physical activity level (PAL, 1.4-1.8) and age.

<sup>c</sup> Percentage of mean intake to the DACH recommended intake level \* 100. Recommended intake is estimated on the basis of the age-sex groups of the DACH guidelines, weighted by the age and sex distribution of the study population. For alcohol intake the maximum tolerated dosage was taken.

<sup>d</sup> Federal Food Safety and Veterinary Office FSVO, [www.naehrwertdaten.ch](http://www.naehrwertdaten.ch).

<sup>e</sup> BLV (2009). Kohlenhydrate in unserer Ernährung – Empfehlungen des BLV. [www.blv.admin.ch](http://www.blv.admin.ch).

<sup>f</sup> BLV (2012). Fett in unserer Ernährung – Empfehlung des BLV. [www.blv.admin.ch](http://www.blv.admin.ch), recommendations as a percentage of the daily energy demand and based on a daily energy intake of 2000 kcal.

<sup>g</sup> Total vitamin A= retinol + carotene/12, expressed in µg RAE.

<sup>h</sup> Maximum tolerated dosage.

**Supplemental Table S4.** Scoring method and mean scores (95%CI) of components of the modified Alternate Healthy Eating Index<sup>a, b</sup> by sex in childhood cancer survivors and the general population in Switzerland (Bus Santé and CoLaus)

| Components                                                           | Criteria for         |                       | Score in CCSs <sup>m</sup><br>mean (95% CI) |                          | Population-based samples                         |                          |                                               |                          |
|----------------------------------------------------------------------|----------------------|-----------------------|---------------------------------------------|--------------------------|--------------------------------------------------|--------------------------|-----------------------------------------------|--------------------------|
|                                                                      |                      |                       |                                             |                          | Score in Bus Santé <sup>n</sup><br>mean (95% CI) |                          | Score in CoLaus <sup>n</sup><br>mean (95% CI) |                          |
|                                                                      | minimum<br>score (0) | maximum<br>score (10) | men<br>(n =386)                             | women<br>(n =389)        | men<br>(n =1,230)                                | women<br>(n =1,301)      | men<br>(n =628)                               | women<br>(n =648)        |
| Vegetables, excluding potatoes (servings/day) <sup>c</sup>           | 0                    | ≥ 5                   | 2.5 (2.3, 2.7)                              | 2.9 (2.7, 3.1)           | 3.1 (2.9, 3.2)                                   | 3.4 (3.3, 3.6)           | 2.7 (2.5, 2.8)                                | 3.2 (3.0, 3.3)           |
| Fruit, excluding juice (servings/day) <sup>d</sup>                   | 0                    | ≥ 4                   | 2.8 (2.5, 3.1)                              | 3.6 (3.3, 3.9)           | 3.6 (3.4, 3.7)                                   | 3.9 (3.8, 4.1)           | 3.4 (3.2, 3.7)                                | 4.3 (4.0, 4.5)           |
| Whole grains (g/day) <sup>e</sup>                                    |                      |                       |                                             |                          |                                                  |                          |                                               |                          |
| Men                                                                  | 0                    | ≥ 90                  | 3.4 (3.1, 3.7)                              |                          | 3.3 (3.1, 3.5)                                   |                          | 3.3 (3.0, 3.6)                                |                          |
| Women                                                                | 0                    | ≥ 75                  |                                             | 4.2 (3.9, 4.5)           |                                                  | 3.8 (3.6, 4.0)           |                                               | 4.4 (4.1, 4.7)           |
| Sugar-sweetened beverage and fruit juice (servings/day) <sup>f</sup> | ≥ 1                  | 0                     | 4.7 (4.4, 5.1)                              | 5.5 (5.1, 5.9)           | 4.4 (4.2, 4.6)                                   | 5.3 (5.0, 5.5)           | 3.8 (3.4, 4.1)                                | 4.6 (4.3, 5.0)           |
| Nuts, seeds, legumes, and tofu (servings/day) <sup>g</sup>           | 0                    | ≥ 1                   | 0.7 (0.4, 0.9)                              | 1.0 (0.8, 1.2)           | 0.8 (0.7, 0.9)                                   | 0.9 (0.8, 1.0)           | 0.5 (0.3, 0.6)                                | 0.7 (0.5, 0.9)           |
| Red and processed meat (servings/day) <sup>h</sup>                   | ≥ 1.5                | 0                     | 2.8 (2.5, 3.1)                              | 5.6 (5.3, 5.9)           | 3.7 (3.5, 3.9)                                   | 5.5 (5.4, 5.7)           | 3.5 (3.3, 3.8)                                | 5.3 (5.0, 5.5)           |
| Trans fat (% of total energy intake) <sup>i</sup>                    | ≥ 4                  | ≤ 0.5                 | 9.4 (9.3, 9.4)                              | 9.4 (9.3, 9.4)           | 9.5 (9.4, 9.5)                                   | 9.4 (9.4, 9.4)           | 9.5 (9.5, 9.6)                                | 9.5 (9.5, 9.5)           |
| Fish, excluding processed products (g/day)                           | 0                    | 32.4                  | 5.9 (5.5, 6.2)                              | 5.7 (5.3, 6.0)           | 7.7 (7.5, 7.9)                                   | 7.4 (7.2, 7.6)           | 7.7 (7.5, 8.0)                                | 7.6 (7.4, 7.9)           |
| PUFA (% of total energy intake) <sup>j</sup>                         | ≤ 2                  | ≥ 10                  | 4.9 (4.6, 5.1)                              | 5.1 (4.9, 5.4)           | 4.6 (4.4, 4.7)                                   | 5.2 (5.1, 5.4)           | 4.8 (4.6, 5.0)                                | 5.2 (5.0, 5.4)           |
| Sodium (mg/day) <sup>k</sup>                                         | Highest<br>decile    | Lowest<br>decile      | 5.0 (4.7, 5.3)                              | 5.0 (4.6, 5.3)           | 5.0 (4.9, 5.2)                                   | 4.9 (4.8, 5.1)           | 5.0 (4.7, 5.3)                                | 5.0 (4.7, 5.2)           |
| Alcohol (drinks/day) <sup>l</sup>                                    |                      |                       |                                             |                          |                                                  |                          |                                               |                          |
| Men                                                                  | ≥ 3.5                | 0.5 - 2.0             | 5.7 (5.4, 6.0)                              |                          | 6.1 (5.9, 6.4)                                   |                          | 5.9 (5.6, 6.2)                                |                          |
| Women                                                                | ≥ 2.5                | 0.5 - 1.5             |                                             | 4.0 (3.6, 4.3)           |                                                  | 4.7 (4.5, 4.9)           |                                               | 4.2 (4.0, 4.5)           |
| <b>Total</b>                                                         | <b>0</b>             | <b>110</b>            | <b>47.7 (46.6, 48.9)</b>                    | <b>51.9 (50.8, 53.0)</b> | <b>51.8 (51.1, 52.5)</b>                         | <b>54.4 (53.8, 55.1)</b> | <b>50.2 (49.3, 51.1)</b>                      | <b>54.0 (53.1, 54.9)</b> |

Abbreviations: CCS, childhood cancer survivors; CI, confidence interval; ICC3, *International Childhood Cancer Classification*, 3<sup>rd</sup> edition; PUFA, polyunsaturated fatty acids.<sup>a</sup> Adapted from Chiuve et al. J Nutr 2012 142(6):1009-18<sup>b</sup> Intermediate food intake was scored proportionately between the minimum score 0 and the maximum score 10.<sup>c</sup> One serving was equal to 118.3g of raw or cooked vegetables or 250g of vegetable soup. Dried vegetables were not included.<sup>d</sup> One serving was equal to 118.3g of raw or cooked fruit. Dried fruit was not included.<sup>e</sup> Whole grain products like whole grain bread and muesli were included.<sup>f</sup> One serving was equal to 226.8g.<sup>g</sup> One serving was equal to 28.4g.<sup>h</sup> One serving was equal to 113.4g of red meat or 42.5g of processed meat.<sup>i</sup> Consumption was estimated based on the assumption that each food contains a maximum of 2g of trans fat per 100g of total fat, as defined in Swiss regulation.<sup>j</sup> The highest score was given to individuals with ≥10% of total energy intake from polyunsaturated fatty acids (PUFA).<sup>k</sup> Na intake based on FFQ data was calculated with the equation: (8.20 + 0.38 x FFQ in males)/2.54 and (4.55 + 0.67 x FFQ in females)/2.54, with 1 g Na = 2.54 g salt (NaCl) [26]. Within CCSs mean values in lowest decile were 2.0g/d in women and 3.4g/d in men and in highest decile were 2.7g/d in women and 3.9g/d in men; Within Bus Santé mean values in lowest decile were 2.0g/d in women and 3.4g/d in men and in highest decile were 2.7g/d in women and 3.9g/d in men; Within CoLaus mean values in lowest decile were 2.0g/d in women and 3.4g/d in men and in highest decile were 2.8g/d in women and 3.8g/d in men<sup>l</sup> One drink was 113.4g of wine, 340.2g of beer or 42.5g of liquor. A score of 2.5 was given to nondrinkers.

## Dietary intake and diet quality of adult survivors of childhood cancer and the general population: Results from the SCCSS-Nutrition study

<sup>m</sup> Adjusted for sex, age at survey, and ICCC-3 diagnosis

<sup>n</sup> Adjusted for sex and age at survey and standardized on sex and age at survey according to CCSs.



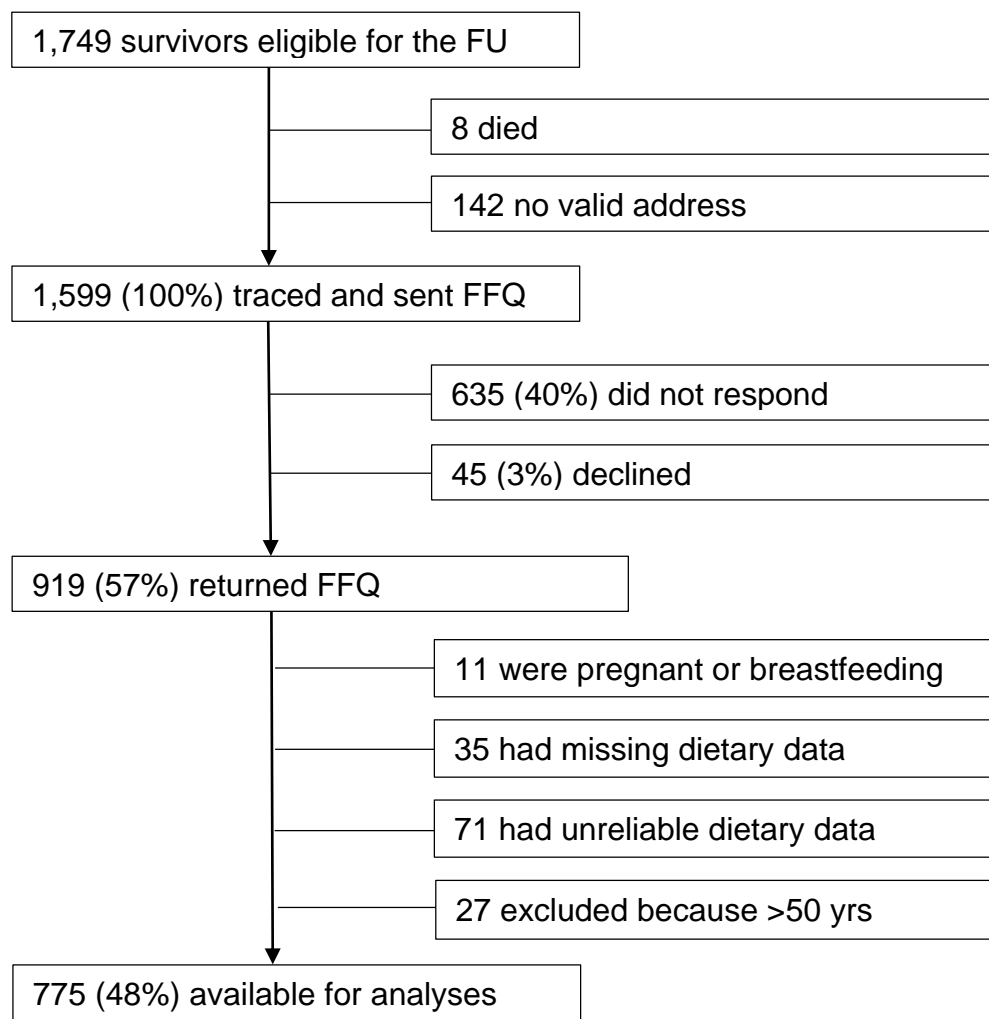

**Supplemental Figure 1.** Response rates in the Swiss Childhood Cancer Survivor Study (SCCSS)-Nutrition study

Abbreviations: FFQ, food frequency questionnaire; FU, follow-up;



## ALIMENTATION

1. Suivez-vous un régime alimentaire?

Non ☐

Oui ☐

Si oui, lequel?

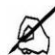

2. Lequel des aliments suivants **excluez-vous totalement** de votre alimentation? (*plusieurs choix possible*)

- |                                                                |                                                       |
|----------------------------------------------------------------|-------------------------------------------------------|
| œufs <input type="checkbox"/>                                  | fromages <input type="checkbox"/>                     |
| viande (bœuf, porc, veau, etc.) <input type="checkbox"/>       | lait <input type="checkbox"/>                         |
| volaille (poulet, dinde, canard etc.) <input type="checkbox"/> | autres produits laitiers <input type="checkbox"/>     |
| fruits <input type="checkbox"/>                                | fruits à coque <input type="checkbox"/>               |
| légumes <input type="checkbox"/>                               | céréales <input type="checkbox"/>                     |
| poissons <input type="checkbox"/>                              | alcool <input type="checkbox"/>                       |
| fruits de mer <input type="checkbox"/>                         | aucun des aliments ci-dessus <input type="checkbox"/> |

## Instructions pour remplir le questionnaire

Par ce questionnaire, nous souhaitons connaître votre alimentation au cours des **4 dernières semaines**.

Pour chaque type d'aliment, nous vous demandons de **comparer votre portion habituelle à la portion de référence**, selon l'exemple ci-dessous.

### Exemple

Cette personne a mangé le mois dernier du pain complet midi et soir, donc 2 fois par jour; elle a mangé 2 tranches de pain à chaque fois, donc plus que la portion de référence.

Elle a mangé du beefsteak 1 à 2 fois par semaine, sa tranche de viande pesant environ 150 grammes donc pareille à la portion moyenne de référence.

| ALIMENTS                                  | FREQUENCE                       |              |                  |                     |                     |              |                      | QUANTITE             |               |        |      |
|-------------------------------------------|---------------------------------|--------------|------------------|---------------------|---------------------|--------------|----------------------|----------------------|---------------|--------|------|
|                                           | Jamais ces 4 dernières semaines | 1 x par mois | 2 à 3 x par mois | 1 à 2 x par semaine | 3 à 4 x par semaine | 1 x par jour | 2 x ou plus par jour | Portion de référence | Votre portion |        |      |
|                                           |                                 |              |                  |                     |                     |              |                      |                      | moins         | pareil | plus |
| Pain complet, au seigle                   |                                 |              |                  |                     |                     |              | X                    | 50g = 1 tranche      |               |        | X    |
| Beefsteak, cheval, veau (escalope, filet) |                                 |              |                  | X                   |                     |              |                      | 150g                 |               | X      |      |

Dietary intake and diet quality of adult survivors of childhood cancer and the general population:  
Results from the SCCSS-Nutrition study

Avec les questions suivantes, nous aimerions savoir votre alimentation au cours des **4 dernières semaines**.

| ALIMENTS | FREQUENCE                                |                 |                        |                           |                           |                    |                               | QUANTITE                |               |        |      |
|----------|------------------------------------------|-----------------|------------------------|---------------------------|---------------------------|--------------------|-------------------------------|-------------------------|---------------|--------|------|
|          | Jamais<br>ces 4<br>dernières<br>semaines | 1 x par<br>mois | 2 à 3 x<br>par<br>mois | 1 à 2 x<br>par<br>semaine | 3 à 4 x<br>par<br>semaine | 1 x<br>par<br>jour | 2 x ou<br>plus<br>par<br>jour | Portion de<br>référence | Votre portion |        |      |
|          |                                          |                 |                        |                           |                           |                    |                               |                         | moins         | pareil | plus |

#### Fromages, Yaourts

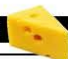

|   |                                                     |  |  |  |  |  |  |                                       |  |  |  |
|---|-----------------------------------------------------|--|--|--|--|--|--|---------------------------------------|--|--|--|
| 1 | yaourt nature                                       |  |  |  |  |  |  | 1 yaourt = 180g                       |  |  |  |
| 2 | yaourt light, flan light, crème light               |  |  |  |  |  |  | 1 yaourt = 180g                       |  |  |  |
| 3 | yaourt aux fruits, flan, crème dessert              |  |  |  |  |  |  | 1 yaourt = 180g                       |  |  |  |
| 4 | fromage blanc 0%                                    |  |  |  |  |  |  | 120g                                  |  |  |  |
| 5 | fromage blanc 20%, ricotta, séré, cottage-cheese    |  |  |  |  |  |  | 100g                                  |  |  |  |
| 6 | feta, mozzarella, fromage frais ½ sel, petit-suisse |  |  |  |  |  |  | 40g = 1 petit-suisse                  |  |  |  |
| 7 | gruyère, tomme, camembert, bleu, parmesan           |  |  |  |  |  |  | 40g = taille d'une boîte d'allumettes |  |  |  |
| 8 | fondue au fromage                                   |  |  |  |  |  |  | 20 bouchées = 3 à 4 tranches de pain  |  |  |  |

#### Pain, Céréales

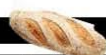

|    |                                                       |  |  |  |  |  |  |                           |  |  |  |
|----|-------------------------------------------------------|--|--|--|--|--|--|---------------------------|--|--|--|
| 9  | pain blanc, pain de mie, de campagne, au lait, tresse |  |  |  |  |  |  | 50g = 1 tranche           |  |  |  |
| 10 | pain complet, pain au seigle                          |  |  |  |  |  |  | 50g = 1 tranche           |  |  |  |
| 11 | muesli ou autres céréales mélangées                   |  |  |  |  |  |  | 50g = ½ gobelet de yaourt |  |  |  |
| 12 | corn-flakes, blé soufflé, céréales soufflées          |  |  |  |  |  |  | 30g = 1 gobelet de yaourt |  |  |  |
| 13 | biscottes, cracottes, pain grillé «suédois»           |  |  |  |  |  |  | 18g = 3 pièces            |  |  |  |

Dietary intake and diet quality of adult survivors of childhood cancer and the general population:  
Results from the SCCSS-Nutrition study

| ALIMENTS                                                                                                       | FREQUENCE                                                    |                 |                        |                           |                           |                    |                               | QUANTITE                                                    |               |        |      |
|----------------------------------------------------------------------------------------------------------------|--------------------------------------------------------------|-----------------|------------------------|---------------------------|---------------------------|--------------------|-------------------------------|-------------------------------------------------------------|---------------|--------|------|
|                                                                                                                | Jamais<br>ces 4<br>dernières<br>semaines                     | 1 x par<br>mois | 2 à 3 x<br>par<br>mois | 1 à 2 x<br>par<br>semaine | 3 à 4 x<br>par<br>semaine | 1 x<br>par<br>jour | 2 x ou<br>plus<br>par<br>jour | Portion de<br>référence                                     | Votre portion |        |      |
|                                                                                                                |                                                              |                 |                        |                           |                           |                    |                               |                                                             | moins         | pareil | plus |
| <b>Viandes</b>                |                                                              |                 |                        |                           |                           |                    |                               |                                                             |               |        |      |
| 14                                                                                                             | beefsteak, cheval<br>veau (escalope, filet)                  |                 |                        |                           |                           |                    |                               | 150g                                                        |               |        |      |
| 15                                                                                                             | poulet sans peau                                             |                 |                        |                           |                           |                    |                               | 80g =<br>1 blanc de<br>poulet                               |               |        |      |
| 16                                                                                                             | poulet avec peau                                             |                 |                        |                           |                           |                    |                               | 80g =<br>1 blanc de<br>poulet                               |               |        |      |
| 17                                                                                                             | steak haché,<br>entrecôte, rôti<br>(bœuf, porc, veau)        |                 |                        |                           |                           |                    |                               | 100g                                                        |               |        |      |
| 18                                                                                                             | jambon, pot-au-feu,<br>côtelettes d'agneau,<br>côtes de porc |                 |                        |                           |                           |                    |                               | 50g =<br>2 tranches<br>fines de<br>jambon ou<br>1 côtelette |               |        |      |
| 19                                                                                                             | saucisson, jambon<br>cru, lard maigre,<br>salami             |                 |                        |                           |                           |                    |                               | 50g =<br>2 tranches                                         |               |        |      |
| 20                                                                                                             | pâté, terrine                                                |                 |                        |                           |                           |                    |                               | 50g =<br>½ tranche                                          |               |        |      |
| 21                                                                                                             | cervelas                                                     |                 |                        |                           |                           |                    |                               | 1 pièce                                                     |               |        |      |
| 22                                                                                                             | saucisse                                                     |                 |                        |                           |                           |                    |                               | 1 pièce                                                     |               |        |      |
| 23                                                                                                             | foie de veau, de<br>génisse, de porc                         |                 |                        |                           |                           |                    |                               | 130g =<br>1 tranche                                         |               |        |      |
| 24                                                                                                             | foie de volaille                                             |                 |                        |                           |                           |                    |                               | 50g =<br>1 pièce                                            |               |        |      |
| <b>Poissons, Crustacés</b>  |                                                              |                 |                        |                           |                           |                    |                               |                                                             |               |        |      |
| 25                                                                                                             | saumon frais,<br>saumon fumé                                 |                 |                        |                           |                           |                    |                               | 100g =<br>1 darne<br>= 2 tranches                           |               |        |      |
| 26                                                                                                             | poisson frit, pané,<br>filets de perche                      |                 |                        |                           |                           |                    |                               | 150g = 3<br>grand sticks                                    |               |        |      |
| 27                                                                                                             | thon à l'huile                                               |                 |                        |                           |                           |                    |                               | 40g = ½<br>boîte                                            |               |        |      |
| 28                                                                                                             | poisson maigre<br>type cabillaud, colin,<br>truite           |                 |                        |                           |                           |                    |                               | 150g                                                        |               |        |      |
| 29                                                                                                             | crevettes,<br>coquillages                                    |                 |                        |                           |                           |                    |                               | 80g                                                         |               |        |      |

Dietary intake and diet quality of adult survivors of childhood cancer and the general population:  
Results from the SCCSS-Nutrition study

| ALIMENTS                                                                                         |                                                                        | FREQUENCE                                |                 |                        |                           |                           |                    |                               | QUANTITE                                         |               |        |      |
|--------------------------------------------------------------------------------------------------|------------------------------------------------------------------------|------------------------------------------|-----------------|------------------------|---------------------------|---------------------------|--------------------|-------------------------------|--------------------------------------------------|---------------|--------|------|
|                                                                                                  |                                                                        | Jamais<br>ces 4<br>dernières<br>semaines | 1 x par<br>mois | 2 à 3 x<br>par<br>mois | 1 à 2 x<br>par<br>semaine | 3 à 4 x<br>par<br>semaine | 1 x<br>par<br>jour | 2 x ou<br>plus<br>par<br>jour | Portion de<br>référence                          | Votre portion |        |      |
|                                                                                                  |                                                                        |                                          |                 |                        |                           |                           |                    |                               |                                                  | moins         | pareil | plus |
| <b>Légumes</b>  |                                                                        |                                          |                 |                        |                           |                           |                    |                               |                                                  |               |        |      |
| 30                                                                                               | haricots verts,<br>épinards                                            |                                          |                 |                        |                           |                           |                    |                               | 180g =<br>1 gobelet<br>yaourt                    |               |        |      |
| 31                                                                                               | choux-fleurs,<br>brocolis                                              |                                          |                 |                        |                           |                           |                    |                               | 180g =<br>1 gobelet<br>yaourt                    |               |        |      |
| 32                                                                                               | tomates                                                                |                                          |                 |                        |                           |                           |                    |                               | 180g =<br>1 grosse ou<br>2 petites<br>tomates    |               |        |      |
| 33                                                                                               | carottes                                                               |                                          |                 |                        |                           |                           |                    |                               | 100g =<br>1 gobelet<br>yaourt                    |               |        |      |
| 34                                                                                               | salade verte                                                           |                                          |                 |                        |                           |                           |                    |                               | 100g =<br>1 gobelet<br>yaourt                    |               |        |      |
| 35                                                                                               | vinaigrette                                                            |                                          |                 |                        |                           |                           |                    |                               | 15g =<br>1 cuill. à<br>soupe                     |               |        |      |
| 36                                                                                               | petits pois,<br>maïs en grains                                         |                                          |                 |                        |                           |                           |                    |                               | 75g =<br>½ gobelet<br>yaourt                     |               |        |      |
| 37                                                                                               | avocat                                                                 |                                          |                 |                        |                           |                           |                    |                               | 100g =<br>½ avocat                               |               |        |      |
| 38                                                                                               | soupe de légumes<br>claire (bouillon de<br>légumes)                    |                                          |                 |                        |                           |                           |                    |                               | 300ml= 1<br>bol ou 1<br>assiette à<br>soupe      |               |        |      |
| 39                                                                                               | soupe de légumes<br>épaisse (aux pois,<br>aux haricots,<br>minestrone) |                                          |                 |                        |                           |                           |                    |                               | 300ml= 1<br>bol ou 1<br>assiette à<br>soupe      |               |        |      |
| 40                                                                                               | pommes de terre<br>nature                                              |                                          |                 |                        |                           |                           |                    |                               | 150g= 1<br>grosse ou 2<br>petites p. de<br>terre |               |        |      |
| 41                                                                                               | frites                                                                 |                                          |                 |                        |                           |                           |                    |                               | 120g =<br>1 poignée                              |               |        |      |

Dietary intake and diet quality of adult survivors of childhood cancer and the general population:  
Results from the SCCSS-Nutrition study

| ALIMENTS                                                                                                                                |                                           | FREQUENCE                                |                 |                        |                           |                           |                    |                               | QUANTITE                                   |               |        |      |
|-----------------------------------------------------------------------------------------------------------------------------------------|-------------------------------------------|------------------------------------------|-----------------|------------------------|---------------------------|---------------------------|--------------------|-------------------------------|--------------------------------------------|---------------|--------|------|
|                                                                                                                                         |                                           | Jamais<br>ces 4<br>dernières<br>semaines | 1 x par<br>mois | 2 à 3 x<br>par<br>mois | 1 à 2 x<br>par<br>semaine | 3 à 4 x<br>par<br>semaine | 1 x<br>par<br>jour | 2 x ou<br>plus<br>par<br>jour | Portion de<br>référence                    | Votre portion |        |      |
|                                                                                                                                         |                                           |                                          |                 |                        |                           |                           |                    |                               |                                            | moins         | pareil | plus |
| <b>Autres</b>                                                                                                                           |                                           |                                          |                 |                        |                           |                           |                    |                               |                                            |               |        |      |
| 42                                                                                                                                      | pâtes alimentaires                        |                                          |                 |                        |                           |                           |                    |                               | 180g cuites<br>= 70g crues                 |               |        |      |
| 43                                                                                                                                      | raviolis, tortellinis,<br>cannellonis     |                                          |                 |                        |                           |                           |                    |                               | 150g cuits =<br>env. 10<br>raviolis        |               |        |      |
| 44                                                                                                                                      | riz                                       |                                          |                 |                        |                           |                           |                    |                               | 150g cuit =<br>60g cru                     |               |        |      |
| 45                                                                                                                                      | sauce tomate                              |                                          |                 |                        |                           |                           |                    |                               | 80g =<br>2 cuill. à<br>soupe               |               |        |      |
| 46                                                                                                                                      | semoule de blé,<br>couscous               |                                          |                 |                        |                           |                           |                    |                               | 80g cuit =<br>2 cuill. à<br>soupe          |               |        |      |
| 47                                                                                                                                      | pizza                                     |                                          |                 |                        |                           |                           |                    |                               | 1/2 pizza de<br>la pizzeria                |               |        |      |
| 48                                                                                                                                      | quiche lorraine                           |                                          |                 |                        |                           |                           |                    |                               | 100 g =<br>1 ramequin<br>2                 |               |        |      |
| 49                                                                                                                                      | œufs                                      |                                          |                 |                        |                           |                           |                    |                               |                                            |               |        |      |
| 50                                                                                                                                      | tofu                                      |                                          |                 |                        |                           |                           |                    |                               | 65g                                        |               |        |      |
| <b>Vous ajoutez sur vos plats ou sur votre pain?</b>  |                                           |                                          |                 |                        |                           |                           |                    |                               |                                            |               |        |      |
| 51                                                                                                                                      | margarine allégée                         |                                          |                 |                        |                           |                           |                    |                               | 10 g =<br>1 cuill. à<br>café               |               |        |      |
| 52                                                                                                                                      | beurre                                    |                                          |                 |                        |                           |                           |                    |                               | 10g =<br>portion<br>bistrot                |               |        |      |
| 53                                                                                                                                      | crème fraîche<br>entière 35%              |                                          |                 |                        |                           |                           |                    |                               | 20g =<br>1 cuill.<br>soupe                 |               |        |      |
| 54                                                                                                                                      | mayonnaise                                |                                          |                 |                        |                           |                           |                    |                               | 10 g =<br>1 cuill. à<br>café               |               |        |      |
| <b>Fruits</b>                                        |                                           |                                          |                 |                        |                           |                           |                    |                               |                                            |               |        |      |
| 55                                                                                                                                      | banane, pomme,<br>poire, prune, raisin    |                                          |                 |                        |                           |                           |                    |                               | 150g =<br>1 fruit ou 1<br>petite<br>grappe |               |        |      |
| 56                                                                                                                                      | orange, mandarine,<br>clémentine          |                                          |                 |                        |                           |                           |                    |                               | 150g =<br>taille d'une<br>orange           |               |        |      |
| 57                                                                                                                                      | pêche, nectarine,<br>abricot, melon       |                                          |                 |                        |                           |                           |                    |                               | 150g = taille<br>d'une pêche               |               |        |      |
| 58                                                                                                                                      | fraises, framboises,<br>myrtilles, cassis |                                          |                 |                        |                           |                           |                    |                               | 120g =<br>1 petite<br>barquette            |               |        |      |
| 59                                                                                                                                      | kiwi                                      |                                          |                 |                        |                           |                           |                    |                               | 80g = 1 fruit                              |               |        |      |
| 60                                                                                                                                      | fruits en conserve,<br>compote sucrée     |                                          |                 |                        |                           |                           |                    |                               | 150g = taille<br>du gobelet<br>de yaourt   |               |        |      |

Dietary intake and diet quality of adult survivors of childhood cancer and the general population:  
Results from the SCCSS-Nutrition study

| ALIMENTS | FREQUENCE                                |                 |                        |                           |                           |                    |                               | QUANTITE                |               |        |      |
|----------|------------------------------------------|-----------------|------------------------|---------------------------|---------------------------|--------------------|-------------------------------|-------------------------|---------------|--------|------|
|          | Jamais<br>ces 4<br>dernières<br>semaines | 1 x par<br>mois | 2 à 3<br>x par<br>mois | 1 à 2 x<br>par<br>semaine | 3 à 4 x<br>par<br>semaine | 1 x<br>par<br>jour | 2 x ou<br>plus<br>par<br>jour | Portion de<br>référence | Votre portion |        |      |
|          |                                          |                 |                        |                           |                           |                    |                               |                         | moins         | pareil | plus |

**Pâtisseries, Sucreries**

|    |                                          |  |  |  |  |  |  |                              |  |  |  |
|----|------------------------------------------|--|--|--|--|--|--|------------------------------|--|--|--|
| 61 | croissant, pain au chocolat              |  |  |  |  |  |  | 1 pièce                      |  |  |  |
| 62 | tarte aux fruits                         |  |  |  |  |  |  | 120g =<br>1 tranche          |  |  |  |
| 63 | gâteau à la crème                        |  |  |  |  |  |  | 90g =<br>1 gâteau            |  |  |  |
| 64 | cake,<br>pâtisserie sèche                |  |  |  |  |  |  | 90g=<br>1 grosse<br>tranche  |  |  |  |
| 65 | biscuits secs,<br>cookies                |  |  |  |  |  |  | 20g=<br>3 biscuits           |  |  |  |
| 66 | chocolat                                 |  |  |  |  |  |  | 15g=<br>3 carrés             |  |  |  |
| 67 | confiture, miel                          |  |  |  |  |  |  | 20g =<br>1 cuill. à<br>soupe |  |  |  |
| 68 | glace, sorbet                            |  |  |  |  |  |  | 100g =<br>1 boule            |  |  |  |
| 69 | sucre artificiel<br>(assugrin, aspartam) |  |  |  |  |  |  | 1 comprimé                   |  |  |  |
| 70 | sucre                                    |  |  |  |  |  |  | 1 morceau<br>et ½            |  |  |  |

**Pour cuisiner**

|    |                    |  |  |  |  |  |  |                             |  |  |  |
|----|--------------------|--|--|--|--|--|--|-----------------------------|--|--|--|
| 71 | beurre             |  |  |  |  |  |  | 10g =<br>portion<br>bistrot |  |  |  |
| 72 | margarine          |  |  |  |  |  |  | 10g =<br>1 cuill. à<br>café |  |  |  |
| 73 | huile d'olive      |  |  |  |  |  |  | 2 cuill. à<br>café          |  |  |  |
| 74 | huile d'arachide   |  |  |  |  |  |  | 2 cuill. à<br>café          |  |  |  |
| 75 | huile de tournesol |  |  |  |  |  |  | 2 cuill. à<br>café          |  |  |  |

**Vitamines, suppléments alimentaires**

|    |                |  |  |  |  |  |  |                     |  |  |  |
|----|----------------|--|--|--|--|--|--|---------------------|--|--|--|
| 76 | vitamine C     |  |  |  |  |  |  | 500 mg              |  |  |  |
| 77 | vitamine E     |  |  |  |  |  |  | 1'000 mg            |  |  |  |
| 78 | multivitamines |  |  |  |  |  |  | 1 comprimé          |  |  |  |
| 79 | son            |  |  |  |  |  |  | 1 cuill. à<br>soupe |  |  |  |
| 80 | comprimé d'ail |  |  |  |  |  |  | 1 comprimé          |  |  |  |

Dietary intake and diet quality of adult survivors of childhood cancer and the general population:  
Results from the SCCSS-Nutrition study

| ALIMENTS | FREQUENCE                                |                 |                        |                           |                           |                    |                               | QUANTITE                |               |        |      |
|----------|------------------------------------------|-----------------|------------------------|---------------------------|---------------------------|--------------------|-------------------------------|-------------------------|---------------|--------|------|
|          | Jamais<br>ces 4<br>dernières<br>semaines | 1 x par<br>mois | 2 à 3 x<br>par<br>mois | 1 à 2 x<br>par<br>semaine | 3 à 4 x<br>par<br>semaine | 1 x<br>par<br>jour | 2 x ou<br>plus<br>par<br>jour | Portion de<br>référence | Votre portion |        |      |
|          |                                          |                 |                        |                           |                           |                    |                               |                         | moins         | pareil | plus |

**Boissons**

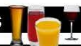

|    |                                                    |  |  |  |  |  |  |                             |  |  |  |
|----|----------------------------------------------------|--|--|--|--|--|--|-----------------------------|--|--|--|
| 81 | café                                               |  |  |  |  |  |  | 1 tasse                     |  |  |  |
| 82 | lait écrémé (à 0%)<br>dans le café                 |  |  |  |  |  |  | 2 cuill. à<br>soupe         |  |  |  |
| 83 | lait entier ou mi-<br>écrémé dans le café          |  |  |  |  |  |  | 2 cuill. à<br>soupe         |  |  |  |
| 84 | crème à café                                       |  |  |  |  |  |  | 1 portion de<br>bistrot     |  |  |  |
| 85 | lait écrémé (à 0%)<br>à boire                      |  |  |  |  |  |  | 2dl = 1 verre               |  |  |  |
| 86 | lait entier ou mi-<br>écrémé à boire               |  |  |  |  |  |  | 2dl = 1 verre               |  |  |  |
| 87 | Aproz, Valser, San<br>Pellegrino, Passuger         |  |  |  |  |  |  | 2dl = 1 verre               |  |  |  |
| 88 | Perrier, Vittel, Volvic                            |  |  |  |  |  |  | 2dl = 1 verre               |  |  |  |
| 89 | eau du robinet,<br>Henniez, Evian,<br>Vichy        |  |  |  |  |  |  | 2dl = 1 verre               |  |  |  |
| 90 | limonade, coca,<br>soda, sirop de fruits           |  |  |  |  |  |  | 2dl = 1 verre               |  |  |  |
| 91 | jus de fruits frais                                |  |  |  |  |  |  | 2dl = 1 verre               |  |  |  |
| 92 | jus de fruits en<br>bouteille ou en<br>brique      |  |  |  |  |  |  | 2dl = 1 verre               |  |  |  |
| 93 | thé, infusion                                      |  |  |  |  |  |  | 2dl =<br>1 tasse            |  |  |  |
| 94 | bière                                              |  |  |  |  |  |  | 3dl =<br>1 cannette         |  |  |  |
| 95 | vin, champagne                                     |  |  |  |  |  |  | 1dl et ½ =<br>1 verre à vin |  |  |  |
| 96 | apéritifs type<br>aniset, Martini                  |  |  |  |  |  |  | ½ dl =<br>¼ de verre        |  |  |  |
| 97 | alcool fort type<br>whisky, eau de vie,<br>liqueur |  |  |  |  |  |  | 1dl =<br>½ verre            |  |  |  |

Dietary intake and diet quality of adult survivors of childhood cancer and the general population:  
Results from the SCCSS-Nutrition study

| ALIMENTS | FREQUENCE                                |                 |                        |                           |                           |                    |                               | QUANTITE                |               |        |      |
|----------|------------------------------------------|-----------------|------------------------|---------------------------|---------------------------|--------------------|-------------------------------|-------------------------|---------------|--------|------|
|          | Jamais<br>ces 4<br>dernières<br>semaines | 1 x par<br>mois | 2 à 3<br>x par<br>mois | 1 à 2 x<br>par<br>semaine | 3 à 4 x<br>par<br>semaine | 1 x<br>par<br>jour | 2 x ou<br>plus<br>par<br>jour | Portion de<br>référence | Votre portion |        |      |
|          |                                          |                 |                        |                           |                           |                    |                               |                         | moins         | pareil | plus |

**Autres**

|     |                                                                                          |  |  |  |  |  |  |                                             |  |  |  |
|-----|------------------------------------------------------------------------------------------|--|--|--|--|--|--|---------------------------------------------|--|--|--|
| 98  | oignons                                                                                  |  |  |  |  |  |  | 1 pièce                                     |  |  |  |
| 99  | concombres,<br>courgettes,<br>aubergines                                                 |  |  |  |  |  |  | 150g =<br>1 gobelet<br>yaourt               |  |  |  |
| 100 | poivrons                                                                                 |  |  |  |  |  |  | ½ pièce                                     |  |  |  |
| 101 | champignons                                                                              |  |  |  |  |  |  | 150g =<br>1 gobelet<br>yaourt               |  |  |  |
| 102 | autres huiles, par ex.<br>huile de colza                                                 |  |  |  |  |  |  | 2 cuill. à<br>café                          |  |  |  |
| 103 | saucés grasses, par<br>ex. sauce à la<br>crème, sauce avec<br>du lait de coco            |  |  |  |  |  |  | ½ dl =<br>3 cuill. à<br>soupe               |  |  |  |
| 104 | sauce bolognaise                                                                         |  |  |  |  |  |  | 160g =<br>4 cuill. à<br>soupe               |  |  |  |
| 105 | fruits à coque<br>(amandes, noix,<br>cacahuètes,<br>noisettes etc.)                      |  |  |  |  |  |  | 1 poignée                                   |  |  |  |
| 106 | sel ajouté                                                                               |  |  |  |  |  |  | 1 pincée                                    |  |  |  |
| 107 | chips                                                                                    |  |  |  |  |  |  | 1 poignée                                   |  |  |  |
| 108 | olives noires et<br>vertes                                                               |  |  |  |  |  |  | 5 pièces                                    |  |  |  |
| 109 | autres fromages,<br>(Emmental, fromage<br>à raclette etc.)                               |  |  |  |  |  |  | 40g = taille<br>d'une boîte<br>d'allumettes |  |  |  |
| 110 | chocolat chaud ou<br>froid, boisson<br>mélangée à base de<br>lait, shake de<br>protéines |  |  |  |  |  |  | 2dl = 1 verre                               |  |  |  |
| 111 | Nutella                                                                                  |  |  |  |  |  |  | 20g =<br>1 cuill. à<br>soupe                |  |  |  |
| 112 | birchermuesli avec<br>yaourt                                                             |  |  |  |  |  |  | 180g =<br>1 gobelet<br>yaourt               |  |  |  |



Dietary intake and diet quality of adult survivors of childhood cancer and the general population:  
Results from the SCCSS-Nutrition study

| ALIMENTS                                                                               | FREQUENCE                                |                 |                        |                           |                           |                    |                               | QUANTITE                |               |        |      |
|----------------------------------------------------------------------------------------|------------------------------------------|-----------------|------------------------|---------------------------|---------------------------|--------------------|-------------------------------|-------------------------|---------------|--------|------|
|                                                                                        | Jamais<br>ces 4<br>dernières<br>semaines | 1 x par<br>mois | 2 à 3<br>x par<br>mois | 1 à 2 x<br>par<br>semaine | 3 à 4 x<br>par<br>semaine | 1 x<br>par<br>jour | 2 x ou<br>plus<br>par<br>jour | Portion de<br>référence | Votre portion |        |      |
|                                                                                        |                                          |                 |                        |                           |                           |                    |                               |                         | moins         | pareil | plus |
| S'il manque des aliments que vous avez mangés le mois dernier, décrivez-les-ci-dessous |                                          |                 |                        |                           |                           |                    |                               |                         |               |        |      |
| 113                                                                                    |                                          |                 |                        |                           |                           |                    |                               |                         |               |        |      |
| 114                                                                                    |                                          |                 |                        |                           |                           |                    |                               |                         |               |        |      |
| 115                                                                                    |                                          |                 |                        |                           |                           |                    |                               |                         |               |        |      |
| 116                                                                                    |                                          |                 |                        |                           |                           |                    |                               |                         |               |        |      |
| 117                                                                                    |                                          |                 |                        |                           |                           |                    |                               |                         |               |        |      |
| 118                                                                                    |                                          |                 |                        |                           |                           |                    |                               |                         |               |        |      |

Sur cette page vous trouvez de la place pour partager avec nous vos questions, remarques, critiques et suggestions à propos de l'étude. Nous vous sommes très reconnaissants pour vos commentaires.



9

**Supplemental Figure S2.** Food frequency questionnaire in French used in the Swiss Childhood Cancer Survivor Study (SCCSS)-Nutrition study
